# Supplementary material for: Utility of specific amino acid ratios in screening for pyruvate dehydrogenase complex deficiencies and other mitochondrial disorders associated with congenital lactic acidosis and newborn screening prospects
Source: PubMed Central journal article supplement (PMC7653239; doi:10.1002/jmd2.12153), 2020-08-16
Supplement: JMD2-56-70-s004.pdf [file JMD2-56-70-s004.pdf]

**Supplementary Table 2.** Neonatal and biochemical characteristics of patients fulfilling combined Ala:Leu  $\geq 4.0$  and Pro:Leu  $\geq 3.0$  criterion (red) from either DBS or plasma analysis at one institution

| Gender         | GA (wk) | BW (g) | DBS Collection time (h) | NBS DBS Ala:Leu    | NBS DBS Pro:Leu   | Age at PAA Draw #1 (DOL) | PAA Ala:Leu        | PAA Pro:Leu        | Clinical phenotype and diagnosis                                                                                                                                | NICU stay at DBS collection | Diet (B/F/BF) |
|----------------|---------|--------|-------------------------|--------------------|-------------------|--------------------------|--------------------|--------------------|-----------------------------------------------------------------------------------------------------------------------------------------------------------------|-----------------------------|---------------|
| M              | 38      | 3060   | 24                      | <b><u>11.4</u></b> | <b><u>7.4</u></b> | 1                        | <b><u>17.1</u></b> | <b><u>11.5</u></b> | HSD10 mitochondrial disease, hemizygous pathogenic <i>HSD17B10</i>                                                                                              | Y                           | B             |
| F              | 39      | 3080   | 25                      | <b><u>7.3</u></b>  | <b><u>4.0</u></b> | 28                       | <b><u>20.1</u></b> | <b><u>10.6</u></b> | PDCD, heterozygous pathogenic <i>PDHA1</i>                                                                                                                      | Y                           | BF            |
| M              | 28      | 1200   | 24                      | <b><u>4.4</u></b>  | <b><u>7.1</u></b> | 61                       | 3.0                | 2.5                | Prematurity, renal disease, transaminitis, bilateral hydrocele, dysmorphic facial features                                                                      | Y                           | B             |
| F              | 41      | 3210   | 30                      | 3.4                | 1.9               | 2                        | <b><u>5.5</u></b>  | <b><u>3.4</u></b>  | Jaundice, functional murmur, acidosis                                                                                                                           | Y                           | B             |
| F              | 39      | 2566   | 28                      | 3.4                | 1.9               | 65                       | <b><u>5.4</u></b>  | <b><u>5.6</u></b>  | Proximal RTA, biallelic pathogenic <i>SLC4A4</i>                                                                                                                | N                           | F             |
| M              | 37      | 2330   | 28                      | 2.2                | 1.5               | 6                        | <b><u>5.4</u></b>  | <b><u>3.1</u></b>  | FTT                                                                                                                                                             | N                           | F             |
| M              | 29      | 1050   | 24                      | 1.3                | 1.3               | 16                       | <b><u>4.8</u></b>  | <b><u>3.0</u></b>  | Prematurity, abnormal NBS methionine, congenital dilation of cerebral ventricles, ASD, twin-twin transfusion syndrome donor twin, multiple congenital anomalies | Y                           | B             |
| F              | 27      | 1210   | 26                      | 3.1                | 1.6               | 35                       | <b><u>4.4</u></b>  | <b><u>3.1</u></b>  | Prematurity, abnormal NBS methionine                                                                                                                            | Y                           | B             |
| M              | 35      | 2568   | 24                      | 2.8                | 2.4               | 503                      | <b><u>4.3</u></b>  | <b><u>3.7</u></b>  | Prematurity, FTT, celiac disease (biopsy proven disease)                                                                                                        | N                           | B or F        |
| F              | 41      | 3930   | 24                      | 2.8                | 1.8               | 264                      | <b><u>4.2</u></b>  | <b><u>3.1</u></b>  | Transcobalamin deficiency, methylmalonic acidemia                                                                                                               | N                           | B             |
| <b>Average</b> | 35      | 2420   | 26                      | 4.2                | 3.1               | 98                       | 7.4                | 5.0                |                                                                                                                                                                 |                             |               |
| <b>Median</b>  | 38      | 2567   | 25                      | 3.2                | 1.9               | 32                       | 5.1                | 3.3                |                                                                                                                                                                 |                             |               |
| <b>SD</b>      | 5       | 979    | 2                       | 3.0                | 2.3               | 162                      | 6.0                | 3.3                |                                                                                                                                                                 |                             |               |
| <b>Min</b>     | 27      | 1050   | 24                      | 1.3                | 1.3               | 1                        | 3.0                | 2.5                |                                                                                                                                                                 |                             |               |
| <b>Max</b>     | 41      | 3930   | 30                      | 11.4               | 7.4               | 503                      | 20.1               | 11.5               |                                                                                                                                                                 |                             |               |
| <b>n</b>       | 10      | 10     | 10                      | 10                 | 10                | 10                       | 10                 | 10                 |                                                                                                                                                                 |                             |               |

Abbreviations: ASD, atrial septal defect; BW, birth weight; Diet B, F, or BF refers to breast milk, formula or mix of breast milk and formula, respectively; DBS, dried blood spot; FTT, failure to thrive; GA, gestational age; NBS, newborn screening; PAA, plasma amino acids; RTA, renal tubular acidosis; and SD, standard deviation.

Numbers in red, bold and underlined indicate fulfillment of the combined Ala:Leu  $\geq 4.0$  and Pro:Leu  $\geq 3.0$  criterion (CRC) and also correspond to the red dots in Fig 2A (for NBS DBS) and Fig 2B (for PAA).
