# Supplementary material for: Utility of specific amino acid ratios in screening for pyruvate dehydrogenase complex deficiencies and other mitochondrial disorders associated with congenital lactic acidosis and newborn screening prospects
Source: PubMed Central journal article supplement (PMC7653239; doi:10.1002/jmd2.12153), 2020-08-16
Supplement: JMD2-56-70-s005.pdf [file JMD2-56-70-s005.pdf]

**Supplementary Table 3.**

Clinical and molecular details of subjects with PDCD and MtDs identified using the protocol

| Subject | Genetic change and classification                                                                                                                     | Molecular testing      | Brain anomaly and other clinical features                                                              |
|---------|-------------------------------------------------------------------------------------------------------------------------------------------------------|------------------------|--------------------------------------------------------------------------------------------------------|
| 1       | Het <i>PDHA1</i> c.1024C>T (p.Arg342*); pathogenic                                                                                                    | Targeted NGS panel     | Ventriculomegaly, ACC, microcephaly, and seizure                                                       |
| 2       | <i>De novo</i> hemi <i>HSD17B10</i> c.85C>G (p.Arg29Gly); likely pathogenic                                                                           | WES trio               | DD. Brain imaging ND                                                                                   |
| 3       | Het <i>PDHA1</i> c.874_881dup (p.Met294Ilefs*4); pathogenic                                                                                           | 15-gene PDCD NGS panel | Cerebellar hypoplasia, ACC, absent cavum septum, pellucidum, hydrocephalus, hypotonia, DD and seizures |
| 4       | Compound het <i>VARS2</i> c.1925del p.L642Rfs*48 (het father)/c.721C>T p.R241W (het mother); pathogenic/VUS (SIFT/PolyPhen-2, damaging/prob damaging) | WES trio               | Normal postnatal brain ultrasound. Brain MRI ND                                                        |
| 5       | <i>De novo</i> het <i>PDHA1</i> c.899+2T>A exonic; pathogenic                                                                                         | WES trio               | Microcephaly, ventriculomegaly, hearing loss. FTT, and seizure                                         |

Abbreviations: ACC, agenesis of corpus callosum; DD, developmental delay; FTT, failure to thrive; het, heterozygous; hemi, hemizygous; MtD, mitochondrial disorder; ND, not done; NGS, next generation sequencing; PDCD, pyruvate dehydrogenase complex deficiency; prob, probably; trio, includes proband and biological parents; WES, whole exome sequencing.
