# Supplementary material for: Utility of specific amino acid ratios in screening for pyruvate dehydrogenase complex deficiencies and other mitochondrial disorders associated with congenital lactic acidosis and newborn screening prospects
Source: PubMed Central journal article supplement (PMC7653239; doi:10.1002/jmd2.12153), 2020-08-16
Supplement: JMD2-56-70-s006.pdf [file JMD2-56-70-s006.pdf]

**Supplementary Table 4.** Various amino acids and amino acid ratios of subjects with PDCD and MtD identified using the protocol

| Blood AA | Table 1 Subjects | DX        | Defective Gene  | Ala  | Pro | Leu | Lys | Glu | Cit | GLY | Ala:Leu | Pro:Leu | Ala:Lys | Pro:Lys | Ala:Glu | Pro:Glu | Ala:Cit | Pro:Cit | Ala:Gly | Pro:Gly |
|----------|------------------|-----------|-----------------|------|-----|-----|-----|-----|-----|-----|---------|---------|---------|---------|---------|---------|---------|---------|---------|---------|
| Serum    | 1                | PDCD      | <i>PDHA1</i>    | 859  | 346 | 33  | 186 | 38  | 14  | 303 | 26.0    | 10.5    | 4.6     | 1.9     | 22.6    | 9.1     | 61.4    | 24.7    | 2.8     | 1.1     |
| Plasma   | 3                | PDCD      | <i>PDHA1</i>    | 947  | 498 | 47  | 178 | 152 | 22  | 850 | 20.1    | 10.6    | 5.3     | 2.8     | 6.2     | 3.3     | 43.0    | 22.6    | 1.1     | 0.6     |
| Serum    | 5                | PDCD      | <i>PDHA1</i>    | 409  | 318 | 31  | 142 | 30  | 9   | 125 | 13.2    | 10.3    | 2.9     | 2.2     | 13.6    | 10.6    | 45.4    | 35.3    | 3.3     | 2.5     |
|          |                  |           | Mean            | 738  | 387 | 37  | 169 | 73  | 15  | 426 | 19.8    | 10.4    | 4.3     | 2.3     | 14.2    | 7.7     | 49.9    | 27.6    | 2.4     | 1.4     |
| Plasma   | 2                | Other MtD | <i>HSD17B10</i> | 1354 | 907 | 79  | 358 | 53  | 15  | 839 | 17.1    | 11.5    | 3.8     | 2.5     | 25.5    | 17.1    | 90.3    | 60.5    | 1.6     | 1.1     |
| Serum    | 4                | Other MtD | <i>VARS2</i>    | 513  | 252 | 54  | 106 | 48  | 22  | 363 | 9.5     | 4.7     | 4.8     | 2.4     | 10.7    | 5.3     | 23.3    | 11.5    | 1.4     | 0.7     |
|          |                  |           | Mean            | 934  | 580 | 67  | 232 | 51  | 19  | 601 | 13.3    | 8.1     | 4.3     | 2.5     | 18.1    | 11.2    | 56.8    | 36.0    | 1.5     | 0.9     |
| NBS DBS  | 1                | PDCD      | <i>PDHA1</i>    | 906  | 415 | 61  | ND  | ND  | 10  | 436 | 14.8    | 6.8     | NA      | NA      | NA      | NA      | 91.4    | 41.9    | 2.1     | 1.0     |
| NBS DBS  | 3                | PDCD      | <i>PDHA1</i>    | 370  | 205 | 51  | ND  | ND  | 12  | 305 | 7.3     | 4.0     | NA      | NA      | NA      | NA      | 31.0    | 17.1    | 1.2     | 0.7     |
| NBS DBS  | 5                | PDCD      | <i>PDHA1</i>    | 569  | 295 | 83  | ND  | ND  | 14  | 364 | 6.9     | 3.6     | NA      | NA      | NA      | NA      | 39.5    | 20.5    | 1.6     | 0.8     |
|          |                  |           | Mean            | 615  | 305 | 65  | ND  | ND  | 12  | 368 | 9.6     | 4.8     | NA      | NA      | NA      | NA      | 54.0    | 26.5    | 1.6     | 0.8     |
| NBS DBS  | 2                | Other MtD | <i>HSD17B10</i> | 1348 | 879 | 118 | ND  | ND  | 22  | 694 | 11.4    | 7.4     | NA      | NA      | NA      | NA      | 61.7    | 40.2    | 1.9     | 1.3     |
| NBS DBS  | 4                | Other MtD | <i>VARS2</i>    | 357  | 175 | 64  | ND  | ND  | 16  | 428 | 5.6     | 2.8     | NA      | NA      | NA      | NA      | 22.9    | 11.2    | 0.8     | 0.4     |
|          |                  |           | Mean            | 853  | 527 | 91  | ND  | ND  | 19  | 561 | 8.5     | 5.1     | NA      | NA      | NA      | NA      | 42.3    | 25.7    | 1.4     | 0.8     |

Amino acid concentrations in  $\mu\text{M}$

ND = not done

NA = not applicable

NBS = newborn screening

DBS = dried blood spot

MtD = mitochondrial disorders

Aa = amino acids

DX = diagnosis
