# Supplementary material for: Utility of specific amino acid ratios in screening for pyruvate dehydrogenase complex deficiencies and other mitochondrial disorders associated with congenital lactic acidosis and newborn screening prospects
Source: PubMed Central journal article supplement (PMC7653239; doi:10.1002/jmd2.12153), 2020-08-16
Supplement: JMD2-56-70-s007.pdf [file JMD2-56-70-s007.pdf]

**Supplementary Table 5.****Sub-classification of PDCDs:****Currently known, possible and potential molecular etiologies of impaired pyruvate oxidation**

| Enzyme/Complex/Function/Pathway              | Gene                                                 |                         |                    |
|----------------------------------------------|------------------------------------------------------|-------------------------|--------------------|
|                                              | Known                                                | Possible                | Potential          |
| <b>Primary-specific PDCD:</b>                |                                                      |                         |                    |
| Pyruvate dehydrogenase complex               | <i>PDHA1, PDHB, DLAT, PDHX</i>                       |                         |                    |
| Pyruvate dehydrogenase phosphatase           | <i>PDP1</i>                                          | <i>PDP2, PDPR</i>       |                    |
| Pyruvate dehydrogenase kinase                | <i>PDK3</i>                                          | <i>PDK1, PDK2, PDK4</i> |                    |
| <b>Primary-generalized PDCD:</b>             |                                                      |                         |                    |
| Multiple 2-ketoacid Dehydrogenases           | <i>DLD</i>                                           |                         |                    |
| Thiamine/thiamine pyrophosphate transporters | <i>SLC25A19, SLC19A2, SLC19A3</i>                    |                         |                    |
| Thiamine pyrophosphokinase                   | <i>TPK1</i>                                          |                         |                    |
| Pyruvate carrier (mitochondrial)             | <i>MPC1</i>                                          |                         |                    |
| Lipoate metabolism                           | <i>LIAS, LIPT1, LIPT2, SIRT4</i>                     |                         |                    |
| Fe-S Cluster proteins                        | <i>BOLA3, NFU1, FDX1L, IBA57, ISCA1, ISCA2, ISCU</i> | <i>GLRX5, NUBPL</i>     | <i>NFS1, LYRM4</i> |
| Protease                                     | <i>LONP1</i>                                         |                         |                    |
| Regulation of glutathionylation              |                                                      |                         | <i>GLRX2, LRX2</i> |
| <b>Secondary PDCD:</b>                       |                                                      |                         |                    |
| Fatty acid oxidation                         | <i>ECHS1</i>                                         |                         |                    |
| Branched-chain amino acid metabolism         | <i>ECHS1, HIBCH</i>                                  |                         |                    |
| Tricarboxylic acid (TCA) cycle               | <i>SUCLA2, SUCLG1</i>                                | <i>SUCLG2, SUCLA1</i>   |                    |
| Phosphoenolpyruvate carboxykinase            | <i>PCK2, PCK1</i>                                    |                         |                    |
| Bioenergetics/PDC regulation/TCA cycle       | <i>TAZ</i>                                           |                         |                    |
| <b>Other:</b>                                |                                                      |                         |                    |
| Pyruvate carboxylase                         | <i>PC</i>                                            |                         |                    |
|                                              | <i>GOT2, KMT2B, SLC25A1</i>                          | <i>GOT2, FBXL4</i>      |                    |
